# Supplementary material for: Stabilization of hydrated AcIII cation: the role of superatom states in actinium-water bonding
Source: Royal Society of Chemistry journal article supplement (doi:10.1039/d0sc02342f), 2021-01-01
Supplement: d0sc02342f1.pdf [file d0sc02342f1.pdf]

# Supporting Information

## Stabilization of hydrated $\text{Ac}^{\text{III}}$ cation: The existence of superatom states

Yang Gao,<sup>a,b</sup> Payal Grover,<sup>b</sup> Georg Schreckenbach,<sup>b\*</sup>

*a. Institute of Fundamental and Frontier Sciences, University of Electronic Science and Technology of China, Chengdu, Sichuan, 610054, China*

*b. Department of Chemistry, University of Manitoba, Winnipeg, Manitoba, R3T 2N2, Canada*

\*E-mail: [schrecke@cc.umanitoba.ca](mailto:schrecke@cc.umanitoba.ca)

**Part 1. Different isomers of  $\text{Ac}^{\text{III}}$  aquo complexes**

**Part 2.  $\text{Ac-O}_{\text{water}}$  bond lengths of  $\text{Ac}^{\text{III}}$  aquo complexes**

**Part 3. Detailed composition of superatom MOs of  $\text{Ac}^{\text{III}}(\text{H}_2\text{O})_9^{3+}$  complexes**

**Part 4. Molecular orbitals of  $[\text{Ac}^{\text{III}}(\text{H}_2\text{O})_9]^{3+}$  and  $[\text{Ac}@\text{Au}_{14}]^-$  based on the Jellium model**

**Part 5. EDA-NOCV results with and without the explicit second water shell**

**Part 6. Electronic structure of  $[\text{Ac}^{\text{III}}(\text{NH}_3)_9]^{3+}$  and  $[\text{Ac}^{\text{III}}(\text{PH}_3)_9]^{3+}$  complexes**

**Part 7. Electronic structure diagrams for the Ac cation with coordination numbers from 7 to 10**

**Part 8. Optimized geometry of the  $^{\text{aq}}[\text{Ac}^{\text{III}}(\text{H}_2\text{O})_{10}(\text{H}_2\text{O})_{35}]^{3+}$  complex**

## Part 1. Different isomers of $\text{Ac}^{\text{III}}$ aquo complexes.

**Table S1.** Different isomers used as initial structures of  $\text{Ac}^{\text{III}}$  aquo complexes for gas-phase aqueous solution optimizations at the PBE-D3/TZ2P level of theory.

|                                                                         | Initial Structures<br>(symmetry: H atoms removed<br>for clarity)                    |                                                                                      | Optimized Structures                                                                  |
|-------------------------------------------------------------------------|-------------------------------------------------------------------------------------|--------------------------------------------------------------------------------------|---------------------------------------------------------------------------------------|
| <b><math>[\text{Ac}^{\text{III}}(\text{H}_2\text{O})_4]^{3+}</math></b> |                                                                                     |                                                                                      |                                                                                       |
| Isomer 1                                                                | 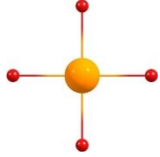   |                                                                                      |     |
|                                                                         | (D4h)                                                                               |                                                                                      |                                                                                       |
| Isomer 2                                                                |    |                                                                                      |                                                                                       |
|                                                                         | (Td)                                                                                |                                                                                      |                                                                                       |
| <b><math>[\text{Ac}^{\text{III}}(\text{H}_2\text{O})_5]^{3+}</math></b> |                                                                                     |                                                                                      |                                                                                       |
| Isomer 1                                                                |  |                                                                                      |   |
|                                                                         | (D3h)                                                                               |                                                                                      |                                                                                       |
| Isomer 2                                                                |  |                                                                                      |                                                                                       |
|                                                                         | (C4v)                                                                               |                                                                                      |                                                                                       |
| <b><math>[\text{Ac}^{\text{III}}(\text{H}_2\text{O})_6]^{3+}</math></b> | Initial Structures<br>(symmetry:<br>after removed<br>H atoms)                       | Aqueous solution                                                                     | Gas-phase                                                                             |
| Isomer 1                                                                |  |  |  |
|                                                                         | (D3d)                                                                               |                                                                                      |                                                                                       |
| Isomer 2                                                                |  |                                                                                      |                                                                                       |
|                                                                         | (Oh)                                                                                |                                                                                      |                                                                                       |
| <b><math>[\text{Ac}^{\text{III}}(\text{H}_2\text{O})_7]^{3+}</math></b> | Initial                                                                             | Optimized Structures                                                                 |                                                                                       |

|                                                                     | Structures<br>(symmetry:<br>after<br>removed H<br>atoms)                            |                              |                                                                                      |
|---------------------------------------------------------------------|-------------------------------------------------------------------------------------|------------------------------|--------------------------------------------------------------------------------------|
| Isomer 1                                                            | 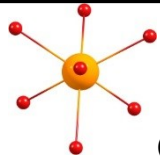   | (C3v)                        |    |
| Isomer 2                                                            |    | (C2v)                        |                                                                                      |
| <b>[Ac<sup>III</sup>(H<sub>2</sub>O)<sub>8</sub>]<sup>3+</sup></b>  |                                                                                     |                              |                                                                                      |
| Isomer 1                                                            |    | Sideview<br>Topview<br>(D2d) |   |
| Isomer 2                                                            |   | Sideview<br>Topview<br>(D4d) |                                                                                      |
| <b>[Ac<sup>III</sup>(H<sub>2</sub>O)<sub>9</sub>]<sup>3+</sup></b>  |                                                                                     |                              |                                                                                      |
| Isomer 1                                                            |  | (C4v)                        |  |
| Isomer 2                                                            |  | (D3h)                        |                                                                                      |
| <b>[Ac<sup>III</sup>(H<sub>2</sub>O)<sub>10</sub>]<sup>3+</sup></b> | <b>Initial Structures</b><br>(symmetry: after<br>removed H atoms)                   | <b>Aqueous solution</b>      | <b>Gas-phase</b>                                                                     |

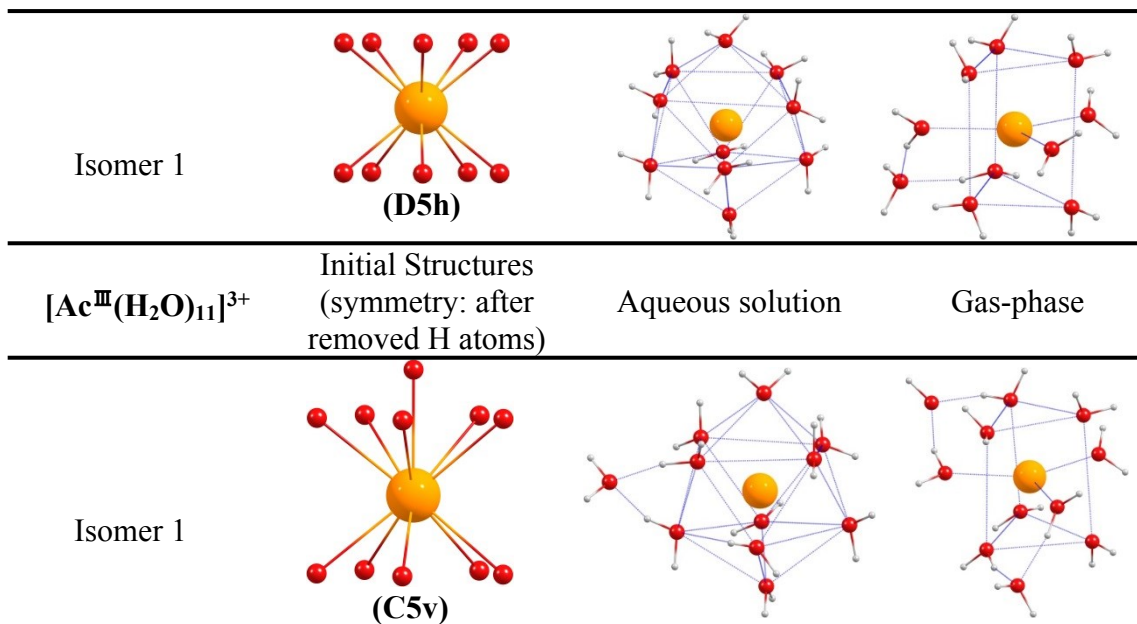

## Part 2. Ac-O<sub>water</sub> bond lengths of Ac<sup>III</sup> aquo complexes

**Table S2.** Ac-O<sub>water</sub> bond lengths (Å) of Ac<sup>III</sup> aquo complexes in both gas phase and aqueous solution. Only the Ac-O<sub>water</sub> bond lengths in the first hydration shell were included in the averages.

|                                                                    | O <sub>1</sub> | O <sub>2</sub> | O <sub>3</sub> | O <sub>4</sub> | O <sub>5</sub> | O <sub>6</sub> | O <sub>7</sub> | O <sub>8</sub> | O <sub>9</sub> | O <sub>10</sub> | Average |
|--------------------------------------------------------------------|----------------|----------------|----------------|----------------|----------------|----------------|----------------|----------------|----------------|-----------------|---------|
| <b>[Ac<sup>III</sup>(H<sub>2</sub>O)<sub>4</sub>]<sup>3+</sup></b> |                |                |                |                |                |                |                |                |                |                 |         |
| gas-SR-PBE-D3                                                      | 2.523          | 2.525          | 2.525          | 2.523          | /              | /              | /              | /              | /              | /               | 2.524   |
| gas-SOC-PBE-D3                                                     | 2.522          | 2.524          | 2.524          | 2.522          | /              | /              | /              | /              | /              | /               | 2.523   |
| aq-SR-PBE-D3                                                       | 2.476          | 2.477          | 2.474          | 2.484          | /              | /              | /              | /              | /              | /               | 2.478   |
| gas-SR-B3LYP-D3                                                    | 2.544          | 2.546          | 2.546          | 2.544          | /              | /              | /              | /              | /              | /               | 2.545   |
| gas-SOC-B3LYP-D3                                                   | 2.542          | 2.544          | 2.544          | 2.542          | /              | /              | /              | /              | /              | /               | 2.543   |
| aq-SR- B3LYP-D3                                                    | 2.504          | 2.505          | 2.505          | 2.504          | /              | /              | /              | /              | /              | /               | 2.505   |
|                                                                    | O <sub>1</sub> | O <sub>2</sub> | O <sub>3</sub> | O <sub>4</sub> | O <sub>5</sub> | O <sub>6</sub> | O <sub>7</sub> | O <sub>8</sub> | O <sub>9</sub> | O <sub>10</sub> | Average |
| <b>[Ac<sup>III</sup>(H<sub>2</sub>O)<sub>5</sub>]<sup>3+</sup></b> |                |                |                |                |                |                |                |                |                |                 |         |
| gas-SR-PBE-D3                                                      | 2.547          | 2.571          | 2.571          | 2.563          | 2.563          | /              | /              | /              | /              | /               | 2.563   |
| gas-SOC-PBE-D3                                                     | 2.547          | 2.571          | 2.571          | 2.562          | 2.562          | /              | /              | /              | /              | /               | 2.563   |
| aq-SR-PBE-D3                                                       | 2.516          | 2.516          | 2.516          | 2.520          | 2.520          | /              | /              | /              | /              | /               | 2.518   |
| gas-SR-B3LYP-D3                                                    | 2.569          | 2.592          | 2.592          | 2.583          | 2.583          | /              | /              | /              | /              | /               | 2.584   |
| gas-SOC-B3LYP-D3                                                   | 2.569          | 2.592          | 2.592          | 2.583          | 2.583          | /              | /              | /              | /              | /               | 2.584   |
| aq-SR- B3LYP-D3                                                    | 2.541          | 2.540          | 2.540          | 2.543          | 2.543          | /              | /              | /              | /              | /               | 2.541   |
|                                                                    | O <sub>1</sub> | O <sub>2</sub> | O <sub>3</sub> | O <sub>4</sub> | O <sub>5</sub> | O <sub>6</sub> | O <sub>7</sub> | O <sub>8</sub> | O <sub>9</sub> | O <sub>10</sub> | Average |
| <b>[Ac<sup>III</sup>(H<sub>2</sub>O)<sub>6</sub>]<sup>3+</sup></b> |                |                |                |                |                |                |                |                |                |                 |         |
| gas-SR-PBE-D3                                                      | 2.599          | 2.598          | 2.599          | 2.599          | 2.598          | 2.599          | /              | /              | /              | /               | 2.599   |
| gas-SOC-PBE-D3                                                     | 2.599          | 2.599          | 2.599          | 2.599          | 2.599          | 2.599          | /              | /              | /              | /               | 2.599   |
| aq-SR-PBE-D3                                                       | 2.545          | 2.548          | 2.553          | 2.562          | 2.551          | 2.555          | /              | /              | /              | /               | 2.552   |
| gas-SR-B3LYP-D3                                                    | 2.620          | 2.619          | 2.620          | 2.620          | 2.619          | 2.620          | /              | /              | /              | /               | 2.620   |
| gas-SOC-B3LYP-D3                                                   | 2.618          | 2.618          | 2.618          | 2.618          | 2.618          | 2.618          | /              | /              | /              | /               | 2.618   |

|                                                                                                |                     |                     |                     |                       |                     |                       |                     |                     |                       |                 |         |
|------------------------------------------------------------------------------------------------|---------------------|---------------------|---------------------|-----------------------|---------------------|-----------------------|---------------------|---------------------|-----------------------|-----------------|---------|
| aq-SR- B3LYP-D3                                                                                | 2.566               | 2.568               | 2.564               | 2.577                 | 2.567               | 2.587                 | /                   | /                   | /                     | /               | 2.572   |
|                                                                                                | O <sub>1</sub>      | O <sub>2</sub>      | O <sub>3</sub>      | O <sub>4</sub>        | O <sub>5</sub>      | O <sub>6</sub>        | O <sub>7</sub>      | O <sub>8</sub>      | O <sub>9</sub>        | O <sub>10</sub> | Average |
| <b>[Ac<sup>III</sup>(H<sub>2</sub>O)<sub>7</sub>]<sup>3+</sup></b>                             |                     |                     |                     |                       |                     |                       |                     |                     |                       |                 |         |
| gas-SR-PBE-D3                                                                                  | 2.619               | 2.630               | 2.636               | 2.635                 | 2.638               | 2.631                 | 2.617               | /                   | /                     | /               | 2.629   |
| gas-SOC-PBE-D3                                                                                 | 2.616               | 2.636               | 2.639               | 2.637                 | 2.640               | 2.637                 | 2.614               | /                   | /                     | /               | 2.631   |
| aq-SR-PBE-D3                                                                                   | 2.574               | 2.581               | 2.582               | 2.580                 | 2.579               | 2.591                 | 2.573               | /                   | /                     | /               | 2.580   |
| gas-SR-B3LYP-D3                                                                                | 2.636               | 2.650               | 2.656               | 2.653                 | 2.657               | 2.651                 | 2.634               | /                   | /                     | /               | 2.648   |
| gas-SOC-B3LYP-D3                                                                               | 2.635               | 2.649               | 2.655               | 2.652                 | 2.656               | 2.650                 | 2.632               | /                   | /                     | /               | 2.647   |
| aq-SR- B3LYP-D3                                                                                | 2.594               | 2.602               | 2.602               | 2.600                 | 2.599               | 2.609                 | 2.593               | /                   | /                     | /               | 2.600   |
|                                                                                                | O <sub>1</sub>      | O <sub>2</sub>      | O <sub>3</sub>      | O <sub>4</sub>        | O <sub>5</sub>      | O <sub>6</sub>        | O <sub>7</sub>      | O <sub>8</sub>      | O <sub>9</sub>        | O <sub>10</sub> | Average |
| <b>[Ac<sup>III</sup>(H<sub>2</sub>O)<sub>8</sub>]<sup>3+</sup></b>                             |                     |                     |                     |                       |                     |                       |                     |                     |                       |                 |         |
| gas-SR-PBE-D3                                                                                  | 2.657               | 2.653               | 2.654               | 2.658                 | 2.661               | 2.662                 | 2.653               | 2.659               | /                     | /               | 2.657   |
| gas-SOC-PBE-D3                                                                                 | 2.663               | 2.659               | 2.661               | 2.663                 | 2.662               | 2.664                 | 2.660               | 2.661               | /                     | /               | 2.662   |
| aq-SR-PBE-D3                                                                                   | 2.610               | 2.611               | 2.611               | 2.611                 | 2.609               | 2.610                 | 2.609               | 2.609               | /                     | /               | 2.610   |
| gas-SR-B3LYP-D3                                                                                | 2.679               | 2.676               | 2.677               | 2.679                 | 2.679               | 2.680                 | 2.677               | 2.678               | /                     | /               | 2.678   |
| gas-SOC-B3LYP-D3                                                                               | 2.677               | 2.674               | 2.675               | 2.677                 | 2.677               | 2.678                 | 2.675               | 2.676               | /                     | /               | 2.676   |
| aq-SR- B3LYP-D3                                                                                | 2.631               | 2.630               | 2.631               | 2.631                 | 2.629               | 2.630                 | 2.629               | 2.629               | /                     | /               | 2.630   |
|                                                                                                | O <sub>1(cap)</sub> | O <sub>2(cap)</sub> | O <sub>3(cap)</sub> | O <sub>4(prism)</sub> | O <sub>5(cap)</sub> | O <sub>6(prism)</sub> | O <sub>7(cap)</sub> | O <sub>8(cap)</sub> | O <sub>9(prism)</sub> | O <sub>10</sub> | Average |
| <b>[Ac<sup>III</sup>(H<sub>2</sub>O)<sub>9</sub>]<sup>3+</sup></b>                             |                     |                     |                     |                       |                     |                       |                     |                     |                       |                 |         |
| gas-SR-PBE-D3                                                                                  | 2.687               | 2.690               | 2.689               | 2.692                 | 2.689               | 2.693                 | 2.690               | 2.692               | 2.693                 | /               | 2.690   |
| gas-SOC-PBE-D3                                                                                 | 2.691               | 2.693               | 2.692               | <b>2.697</b>          | 2.695               | <b>2.697</b>          | 2.695               | 2.697               | <b>2.696</b>          | /               | 2.695   |
| aq-SR-PBE-D3                                                                                   | 2.643               | 2.643               | 2.643               | <b>2.640</b>          | 2.644               | <b>2.640</b>          | 2.642               | 2.644               | <b>2.639</b>          | /               | 2.642   |
| gas-SR-B3LYP-D3                                                                                | 2.703               | 2.705               | 2.704               | 2.708                 | 2.706               | 2.708                 | 2.706               | 2.709               | 2.707                 | /               | 2.706   |
| gas-SOC-B3LYP-D3                                                                               | 2.704               | 2.703               | 2.705               | <b>2.706</b>          | 2.708               | <b>2.707</b>          | 2.706               | 2.708               | <b>2.705</b>          | /               | 2.706   |
| aq-SR- B3LYP-D3                                                                                | 2.663               | 2.664               | 2.663               | <b>2.660</b>          | 2.665               | <b>2.661</b>          | 2.664               | 2.664               | <b>2.659</b>          | /               | 2.663   |
|                                                                                                | O <sub>1</sub>      | O <sub>2</sub>      | O <sub>3</sub>      | O <sub>4</sub>        | O <sub>5</sub>      | O <sub>6</sub>        | O <sub>7</sub>      | O <sub>8</sub>      | O <sub>9</sub>        | O <sub>10</sub> | Average |
| <b>[Ac<sup>III</sup>(H<sub>2</sub>O)<sub>9</sub>(H<sub>2</sub>O)<sub>1</sub>]<sup>3+</sup></b> |                     |                     |                     |                       |                     |                       |                     |                     |                       |                 |         |
| gas-SR-PBE-D3                                                                                  | 2.710               | 2.703               | 2.716               | 2.714                 | 2.705               | 2.691                 | 2.648               | 2.625               | 2.681                 | /               | 2.688   |
| gas-SOC-PBE-D3                                                                                 | 2.675               | 2.690               | 2.709               | 2.725                 | 2.714               | 2.716                 | 2.632               | 2.655               | 2.703                 | /               | 2.691   |
| gas-SR-B3LYP-D3                                                                                | 2.731               | 2.718               | 2.731               | 2.730                 | 2.717               | 2.708                 | 2.664               | 2.646               | 2.695                 | /               | 2.704   |
| gas-SOC-B3LYP-D3                                                                               | 2.729               | 2.717               | 2.728               | 2.728                 | 2.715               | 2.706                 | 2.661               | 2.643               | 2.693                 | /               | 2.702   |

|                                                                                                      |                       |                       |                       |                     |                     |                       |                       |                     |                       |                    |         |
|------------------------------------------------------------------------------------------------------|-----------------------|-----------------------|-----------------------|---------------------|---------------------|-----------------------|-----------------------|---------------------|-----------------------|--------------------|---------|
| <b>[Ac<sup>III</sup>(H<sub>2</sub>O)<sub>10</sub>]<sup>3+</sup></b>                                  |                       |                       |                       |                     |                     |                       |                       |                     |                       |                    |         |
| aq-SR-PBE-D3                                                                                         | 2.662                 | 2.702                 | 2.675                 | 2.722               | 2.693               | 2.652                 | 2.707                 | 2.686               | 2.718                 | 2.678              | 2.690   |
| aq-SR- B3LYP-D3                                                                                      | 2.687                 | 2.720                 | 2.701                 | 2.736               | 2.713               | 2.679                 | 2.726                 | 2.709               | 2.737                 | 2.705              | 2.711   |
|                                                                                                      | O <sub>1</sub>        | O <sub>2</sub>        | O <sub>3</sub>        | O <sub>4</sub>      | O <sub>5</sub>      | O <sub>6</sub>        | O <sub>7</sub>        | O <sub>8</sub>      | O <sub>9</sub>        | O <sub>10/11</sub> | Average |
| <b>[Ac<sup>III</sup>(H<sub>2</sub>O)<sub>9</sub><br/>(H<sub>2</sub>O)<sub>2</sub>]<sup>3+</sup></b>  |                       |                       |                       |                     |                     |                       |                       |                     |                       |                    |         |
| gas-SR-PBE-D3                                                                                        | 2.705                 | 2.674                 | 2.652                 | 2.696               | 2.733               | 2.655                 | 2.664                 | 2.699               | 2.731                 | /                  | 2.690   |
| gas-SOC-PBE-D3                                                                                       | 2.703                 | 2.672                 | 2.649                 | 2.693               | 2.730               | 2.653                 | 2.661                 | 2.695               | 2.728                 | /                  | 2.687   |
| gas-SR-B3LYP-D3                                                                                      | 2.715                 | 2.686                 | 2.665                 | 2.707               | 2.742               | 2.669                 | 2.675                 | 2.711               | 2.739                 | /                  | 2.701   |
| gas-SOC-B3LYP-D3                                                                                     | 2.714                 | 2.685                 | 2.664                 | 2.705               | 2.740               | 2.668                 | 2.674                 | 2.710               | 2.737                 | /                  | 2.700   |
| <b>[Ac<sup>III</sup>(H<sub>2</sub>O)<sub>10</sub><br/>(H<sub>2</sub>O)<sub>1</sub>]<sup>3+</sup></b> |                       |                       |                       |                     |                     |                       |                       |                     |                       |                    |         |
| aq-SR-PBE-D3                                                                                         | 2.718                 | 2.651                 | 2.688                 | 2.700               | 2.757               | 2.665                 | 2.643                 | 2.696               | 2.723                 | 2.689              | 2.693   |
| aq-SR- B3LYP-D3                                                                                      | 2.724                 | 2.663                 | 2.697                 | 2.711               | 2.756               | 2.676                 | 2.657                 | 2.704               | 2.728                 | 2.695              | 2.701   |
|                                                                                                      | O <sub>1</sub>        | O <sub>2</sub>        | O <sub>3</sub>        | O <sub>4</sub>      | O <sub>5</sub>      | O <sub>6</sub>        | O <sub>7</sub>        | O <sub>8</sub>      | O <sub>9</sub>        | O <sub>10</sub>    | Average |
| <b>[Ac<sup>III</sup>(H<sub>2</sub>O)<sub>8</sub><br/>(H<sub>2</sub>O)<sub>16</sub>]<sup>3+</sup></b> |                       |                       |                       |                     |                     |                       |                       |                     |                       |                    |         |
| aq-SR-PBE-D3                                                                                         | 2.640                 | 2.640                 | 2.639                 | 2.640               | 2.641               | 2.640                 | 2.640                 | 2.640               | /                     | /                  | 2.640   |
|                                                                                                      | O <sub>1(prism)</sub> | O <sub>2(prism)</sub> | O <sub>3(prism)</sub> | O <sub>4(cap)</sub> | O <sub>5(cap)</sub> | O <sub>6(prism)</sub> | O <sub>7(prism)</sub> | O <sub>8(cap)</sub> | O <sub>9(prism)</sub> | O <sub>10</sub>    | Average |
| <b>[Ac<sup>III</sup>(H<sub>2</sub>O)<sub>9</sub><br/>(H<sub>2</sub>O)<sub>18</sub>]<sup>3+</sup></b> |                       |                       |                       |                     |                     |                       |                       |                     |                       |                    |         |
| aq-SR-PBE-D3                                                                                         | 2.684                 | 2.645                 | 2.645                 | 2.617               | 2.616               | 2.665                 | 2.659                 | 2.617               | 2.684                 | /                  | 2.648   |

**Part 3. Detailed composition of superatom MOs of  $\text{Ac}^{\text{III}}(\text{H}_2\text{O})_9]^{3+}$  complexes.**

**Table S3.** Detailed composition of superatom MOs of the  $[\text{Ac}^{\text{III}}(\text{H}_2\text{O})_9]^{3+}$ , complexes.

| Superatom Orbitals | $\text{Ac}^{\text{III}}$ cation |       |       |    | $(\text{H}_2\text{O})_9$ Ligand |        |        |
|--------------------|---------------------------------|-------|-------|----|---------------------------------|--------|--------|
|                    | 6d                              | 7s    | 7p    | 5f | 1s (H)                          | 2s (O) | 2p (O) |
| 1D                 | 2.33%                           |       |       |    | 2.12%                           | 5.73%  | 71.17% |
| 1D                 | 1.44%                           |       |       |    | 3.22%                           | 6.13%  | 68.69% |
| 1D                 | 2.17%                           |       |       |    | 2.89%                           | 6.18%  | 71.48% |
| 1D                 | 5.79%                           |       |       |    | 5.01%                           | 6.51%  | 70.33% |
| 1D                 | 5.50%                           |       |       |    | 3.24%                           | 8.32%  | 70.12% |
| 1P                 |                                 |       | 4.90% |    |                                 | 8.68%  | 71.85% |
| 1P                 |                                 |       | 2.79% |    |                                 | 5.88%  | 73.30% |
| 1P                 |                                 |       | 4.41% |    |                                 | 8.66%  | 73.72% |
| 1S                 |                                 | 6.50% |       |    |                                 |        | 74.06% |



**Part 4. Molecular orbitals of  $[\text{Ac}^{\text{III}}(\text{H}_2\text{O})_9]^{3+}$  and  $[\text{Ac}@\text{Au}_{14}]^-$  based on the Jellium model**

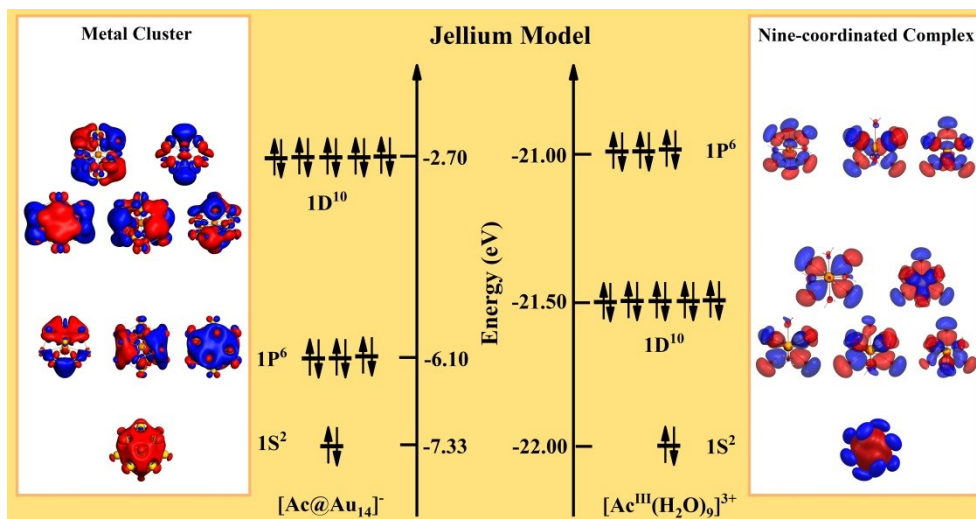

Figure S1. Molecular orbitals listed on the basis of the Jellium model. Left: molecular orbitals of the singlet metal cluster  $[\text{Ac}@\text{Au}_{14}]^-$ . Right: molecular orbitals of the singlet nine-coordinated complex  $[\text{Ac}^{\text{III}}(\text{H}_2\text{O})_9]^{3+}$ .

## Part 5. EDA-NOCV results with and without the explicit second water shell

Table S4. EDA-NOCV results (kcal/mol) for the  $[\text{Ac}^{\text{III}}(\text{H}_2\text{O})_8]^{3+}$ ,  $[\text{Ac}^{\text{III}}(\text{H}_2\text{O})_9]^{3+}$ ,  $[\text{Ac}^{\text{III}}(\text{H}_2\text{O})_8(\text{H}_2\text{O})_{16}]^{3+}$ ,  $[\text{Ac}^{\text{III}}(\text{H}_2\text{O})_9(\text{H}_2\text{O})_{18}]^{3+}$  complexes in gas-phase at the PBE-D3/TZ2P level of theory.

|                            | $\text{Ac}^{\text{III}}$ vs $(\text{H}_2\text{O})_8$ | $\text{Ac}^{\text{III}}$ vs $(\text{H}_2\text{O})_9$ | $\text{Ac}^{\text{III}}$ vs $(\text{H}_2\text{O})_8(\text{H}_2\text{O})_{16}$ | $\text{Ac}^{\text{III}}$ vs $(\text{H}_2\text{O})_9(\text{H}_2\text{O})_{18}$ |
|----------------------------|------------------------------------------------------|------------------------------------------------------|-------------------------------------------------------------------------------|-------------------------------------------------------------------------------|
| $\Delta E_{\text{int}}$    | -444.69                                              | -474.98                                              | -686.86                                                                       | -719.27                                                                       |
| $\Delta E_{\text{pauli}}$  | 141.32                                               | 136.70                                               | 160.30                                                                        | 163.79                                                                        |
| $\Delta E_{\text{dis}}$    | -1.13 (0.19%)                                        | -1.35 (0.22%)                                        | -4.04 (0.48%)                                                                 | -4.47 (0.51%)                                                                 |
| $\Delta E_{\text{elstat}}$ | -335.06<br>(57.18%)                                  | -350.14<br>(57.24%)                                  | -534.24<br>(63.06%)                                                           | -550.88<br>(62.85%)                                                           |
| $\Delta E_{\text{orb}}$    | -249.81<br>(42.63%)                                  | -260.19<br>(42.54%)                                  | -308.89<br>(36.46%)                                                           | -327.71<br>(36.64%)                                                           |

$\text{Ac}^{\text{III}}$  vs  $(\text{H}_2\text{O})_8(\text{H}_2\text{O})_{16}$

Top View

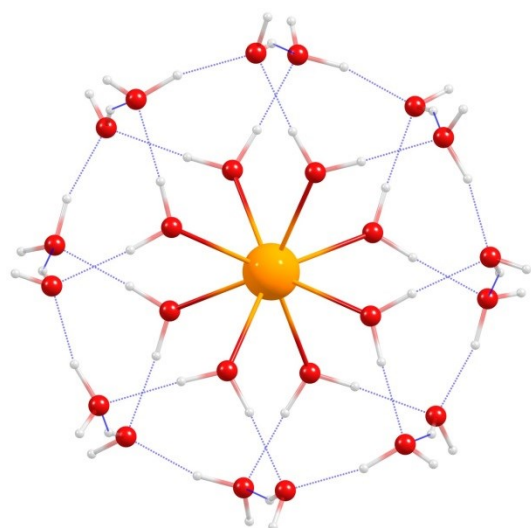

Side View

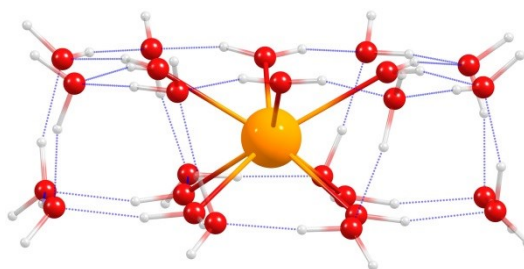

$\text{Ac}^{\text{III}}$  vs  $(\text{H}_2\text{O})_9(\text{H}_2\text{O})_{18}$

Top View

Side View

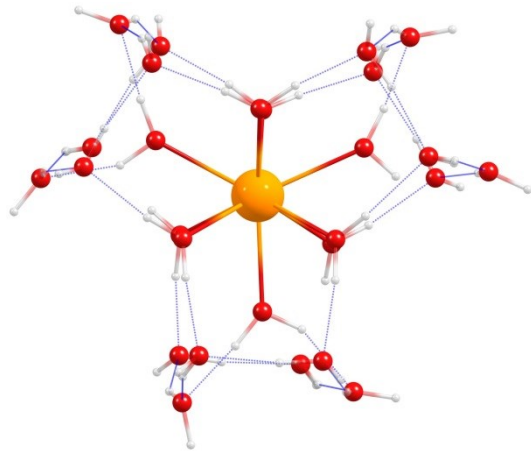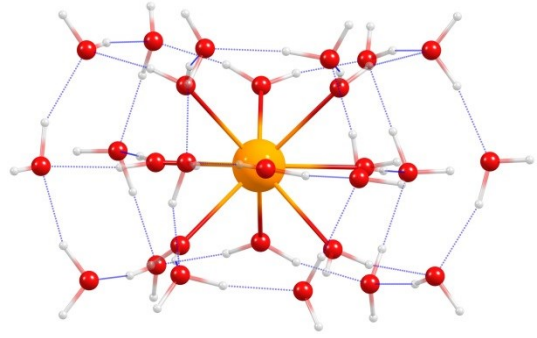

**Part 6. Electronic structure of  $[\text{Ac}^{\text{III}}(\text{NH}_3)_9]^{3+}$  and  $[\text{Ac}^{\text{III}}(\text{PH}_3)_9]^{3+}$  complexes**

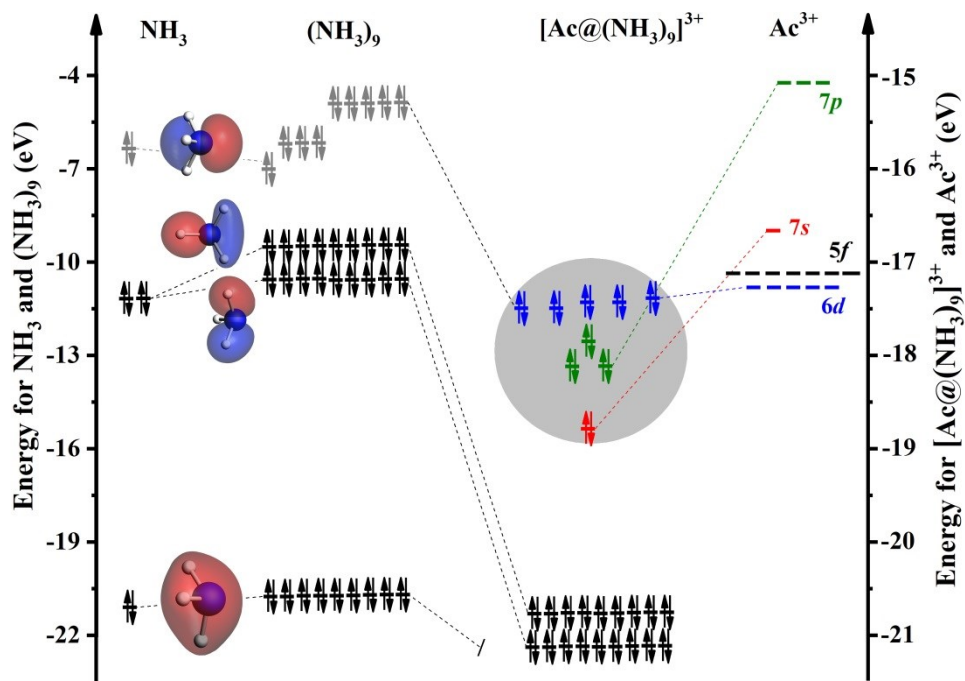

Figure S2. Electronic structure diagram of the  $[\text{Ac}^{\text{III}}(\text{NH}_3)_9]^{3+}$  complex in gas-phase at the PBE-D3/TZ2P level of theory. The MO energies of the  $\text{NH}_3$  molecule and  $(\text{NH}_3)_9$  fragment correspond to the left Y axis, and the MO energies of the  $\text{Ac}^{3+}$  cation and  $[\text{Ac}^{\text{III}}(\text{NH}_3)_9]^{3+}$  complex are shown on the right Y axis.

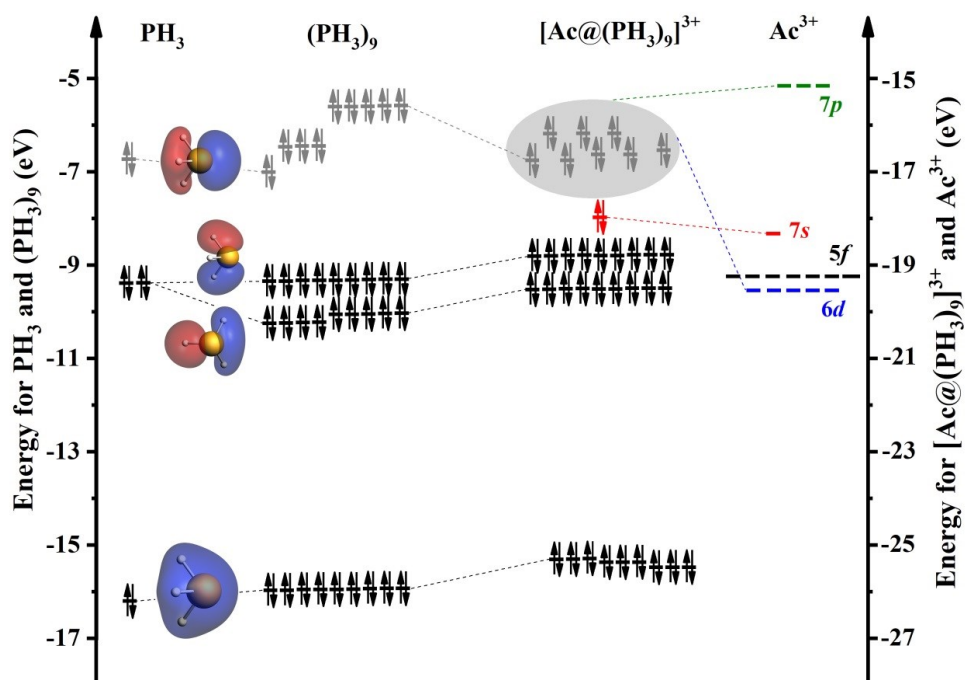

Figure S3. Electronic structure diagram of the  $[\text{Ac}^{\text{III}}(\text{PH}_3)_9]^{3+}$  complex in gas-phase at the PBE-D3/TZ2P level of theory. The MO energies of the  $\text{PH}_3$  molecule and  $(\text{PH}_3)_9$  fragment correspond to the left Y axis, and the MO energies of the  $\text{Ac}^{3+}$  cation and  $[\text{Ac}^{\text{III}}(\text{PH}_3)_9]^{3+}$  complex are shown on the right Y axis.

**Table S5.** Detailed composition of superatom MOs of the  $[\text{Ac}^{\text{III}}(\text{NH}_3)_9]^{3+}$  and  $[\text{Ac}^{\text{III}}(\text{PH}_3)_9]^{3+}$  complexes.

| Superatom Orbitals | $\text{Ac}^{\text{III}}$ cation |        |       |       | $(\text{NH}_3)_9$ Ligand |        |        |
|--------------------|---------------------------------|--------|-------|-------|--------------------------|--------|--------|
|                    | 6d                              | 7s     | 7p    | 5f    | 1s (H)                   | 2s (N) | 2p (N) |
| 1D                 | 5.76%                           |        |       | 2.06% |                          | 6.89%  | 67.57% |
| 1D                 | 7.26%                           |        |       |       |                          | 7.16%  | 61.96% |
| 1D                 | 8.60%                           |        |       | 1.14% |                          | 6.98%  | 65.03% |
| 1D                 | 10.37%                          |        |       |       |                          | 7.68%  | 65.19% |
| 1D                 | 10.41%                          |        |       | 1.22% |                          | 9.91%  | 67.06% |
| 1P                 |                                 |        | 4.37% |       |                          | 6.65%  | 71.07% |
| 1P                 |                                 |        | 4.68% |       |                          | 9.99%  | 73.49% |
| 1P                 |                                 |        | 5.49% |       |                          | 10.17% | 73.69% |
| 1S                 |                                 | 13.24% |       |       |                          |        | 71.09% |
| <hr/>              |                                 |        |       |       |                          |        |        |
|                    | $\text{Ac}^{\text{III}}$ cation |        |       |       | $(\text{PH}_3)_9$ Ligand |        |        |
|                    | 6d                              | 7s     | 7p    | 5f    | 1s (H)                   | 3s (P) | 3p (P) |
|                    | 7.34%                           |        | 1.17% | 1.71% | 6.60%                    | 9.65%  | 53.59% |
|                    | 9.87%                           |        |       | 1.75% | 15.59%                   | 12.34% | 52.17% |
| 1D                 | 6.25%                           |        | 3.15% |       | 12.71%                   | 11.64% | 54.74% |
| and                | 4.40%                           |        | 4.84% |       | 11.95%                   | 11.50% | 55.50% |
| 1P                 | 7.15%                           |        | 3.01% |       | 12.22%                   | 11.09% | 54.99% |
|                    | 5.35%                           |        | 2.86% |       | 12.75%                   | 10.26% | 53.40% |
|                    | 2.50%                           |        | 5.00% |       | 13.43%                   | 10.66% | 53.02% |
|                    | 13.92%                          |        |       |       | 13.16%                   | 10.57% | 50.97% |
| 1S                 |                                 | 21.17% |       |       |                          |        | 63.32% |

**Part 7. Electronic structure diagrams for the of Ac cation with coordination numbers from 7 to 10**

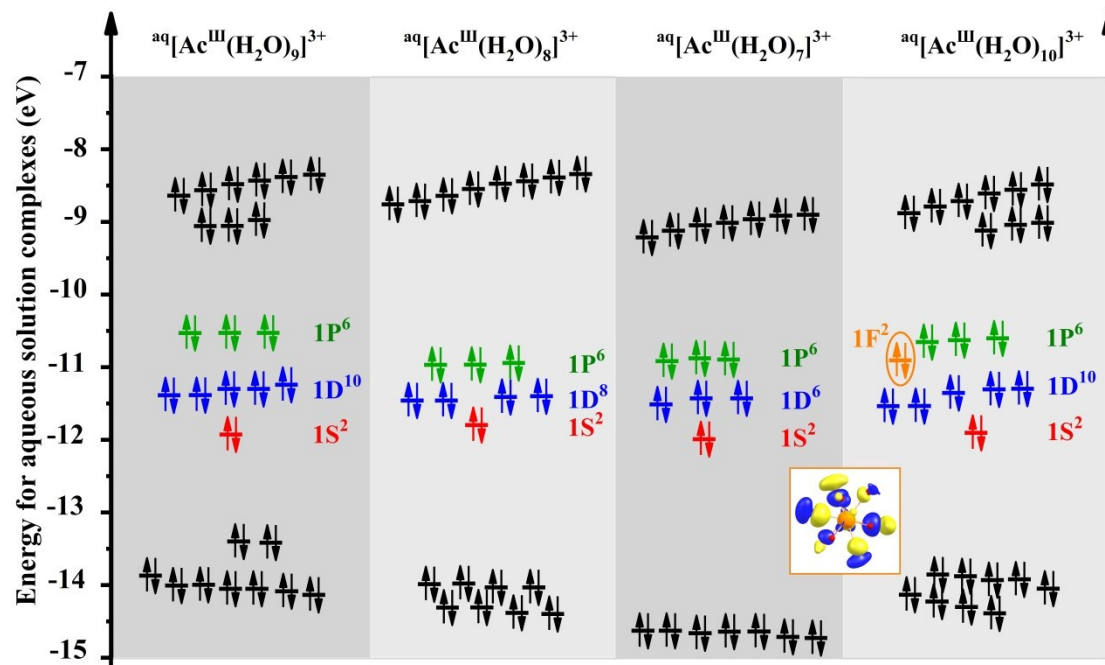

Figure S4. Electronic structure diagrams of  ${}^{\text{aq}}[\text{Ac}^{\text{III}}(\text{H}_2\text{O})_9]^{3+}$ ,  ${}^{\text{aq}}[\text{Ac}^{\text{III}}(\text{H}_2\text{O})_8]^{3+}$ ,  ${}^{\text{aq}}[\text{Ac}^{\text{III}}(\text{H}_2\text{O})_7]^{3+}$ ,  ${}^{\text{aq}}[\text{Ac}^{\text{III}}(\text{H}_2\text{O})_{10}]^{3+}$  complexes at the PBE-D3/TZ2P level of theory. The uppercase letters represent superatomic molecular orbitals.

## Part 8. Optimized geometry of the ${}^{\text{aq}}[\text{Ac}^{\text{III}}(\text{H}_2\text{O})_{10}(\text{H}_2\text{O})_{35}]^{3+}$ complex

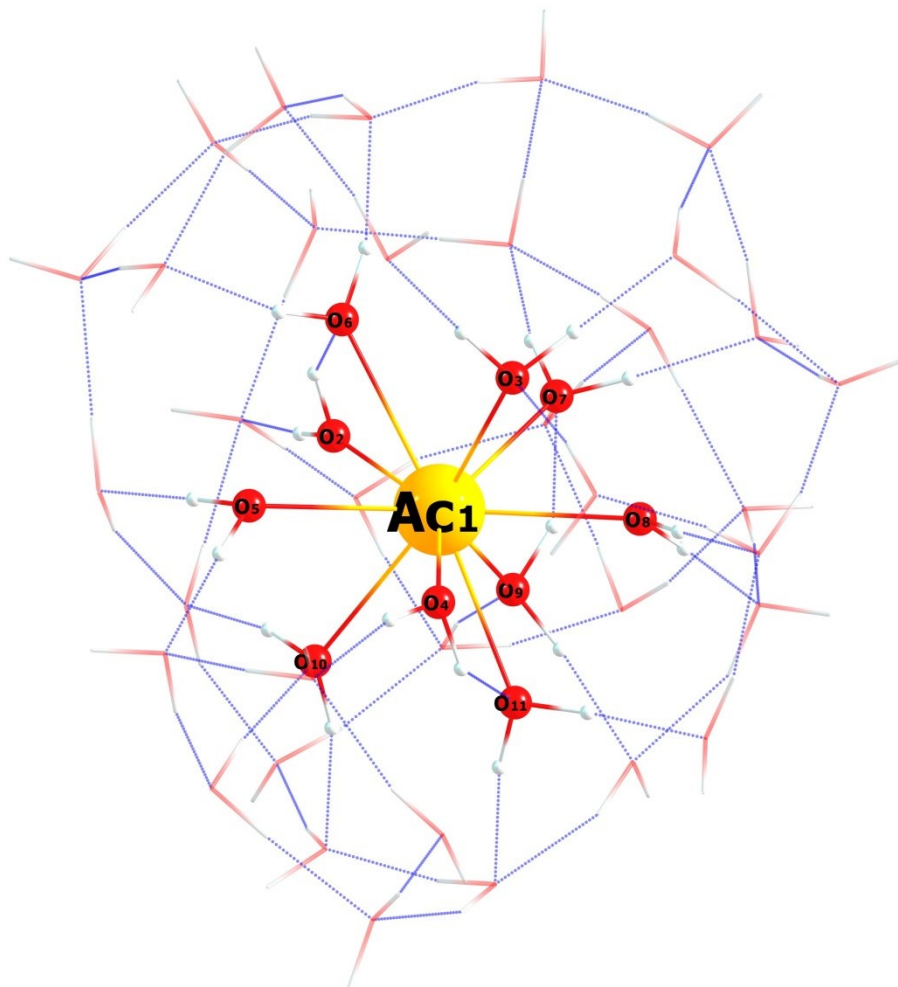

Figure S5. Optimized geometry of the  ${}^{\text{aq}}[\text{Ac}^{\text{III}}(\text{H}_2\text{O})_{10}(\text{H}_2\text{O})_{35}]^{3+}$  complex in aqueous solution at the PBE-D3/TZ2P level of theory.
